# Supplementary material
Source: PubMed Central journal article supplement (PMC11384098)
Supplement: PBI-20-761-s002.pdf [file PBI-20-761-s002.pdf]

## Supporting Figures

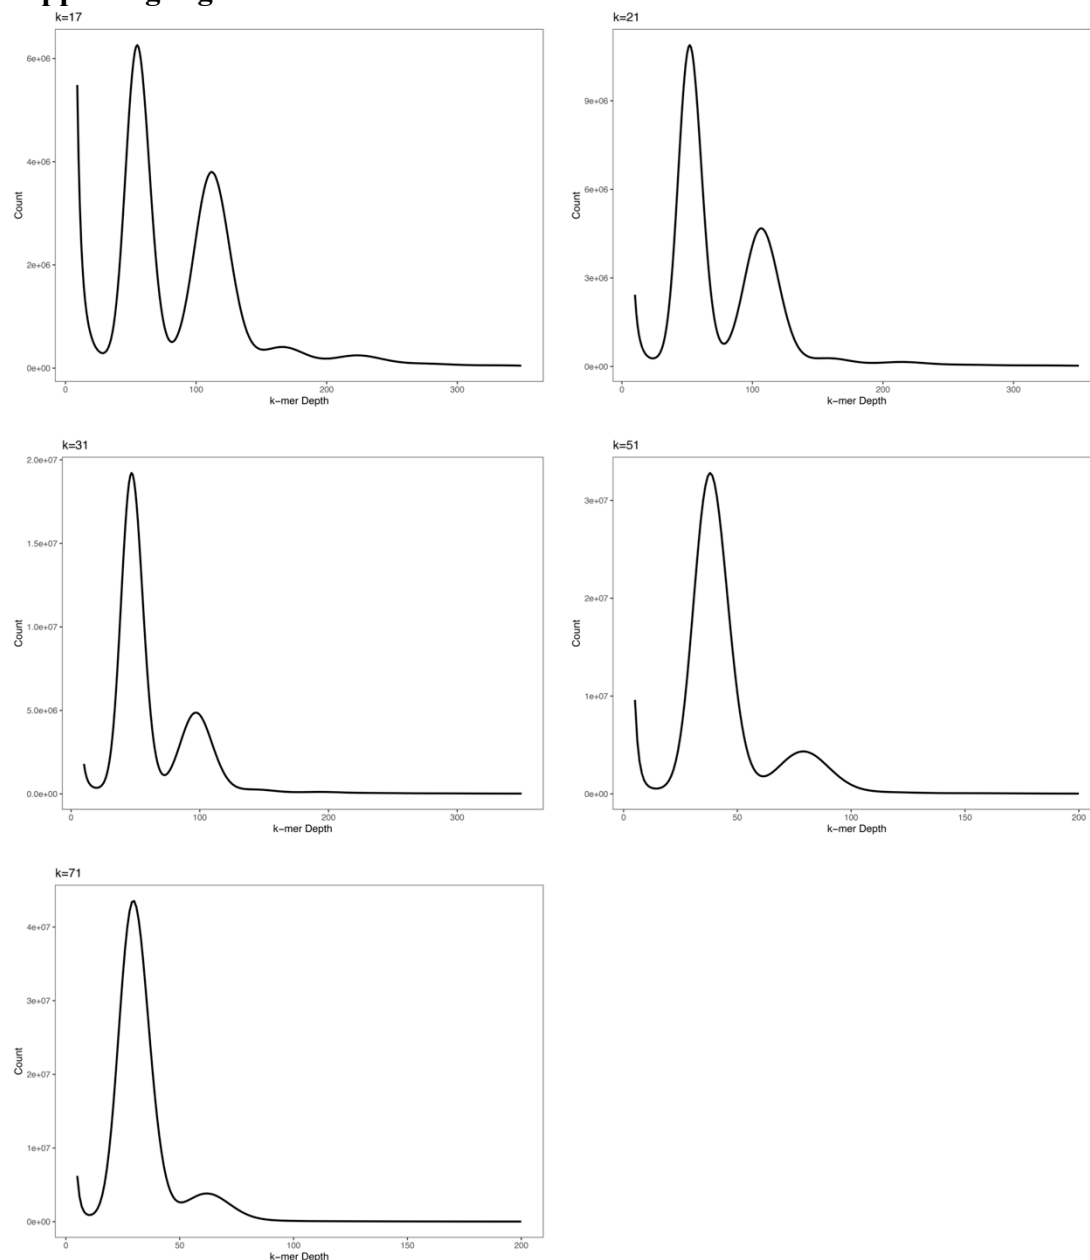

**Figure S1** K-mer based genome size estimates. K = 17, 21, 31, 51 and 71 count histograms of Illumina paired-end sequence data for tetraploid *Trapa natans*. These plots were used to estimate genome size (total k-mer number)/(peak depth). K = 17: a total of 50,029,871,544 17-mers were detected with a peak depth of 54 and an estimated genome size of 926.48 Mb; K = 21: a total of 51,476,584,112 21-mers were detected with a peak depth of 52 and an estimated genome size of 989.93 Mb; K = 31: a total of 50,607,610,875 31-mers were detected with a peak depth of 47 and an estimated genome size of 1076.76 Mb; K = 51: a total of 43,270,633,852 51-mers were detected with a peak depth of 38 and an estimated genome size of 1138.70 Mb; K = 71: a total of 34,807,248,461 71-mers were detected with a peak depth of 30 and an estimated genome size of 1160.24 Mb.

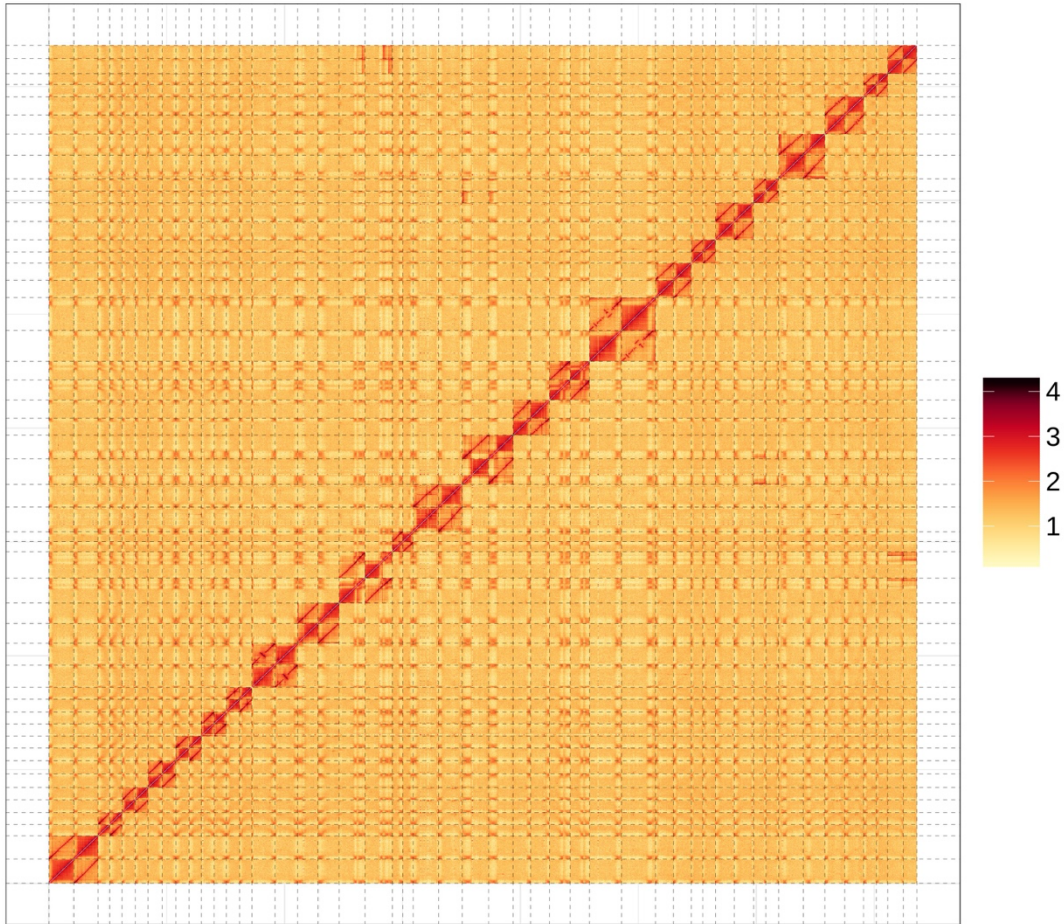

**Figure S2** Genome-wide analysis of chromatin interactions in the tetraploid *Trapa natans* genome based on Hi-C data.

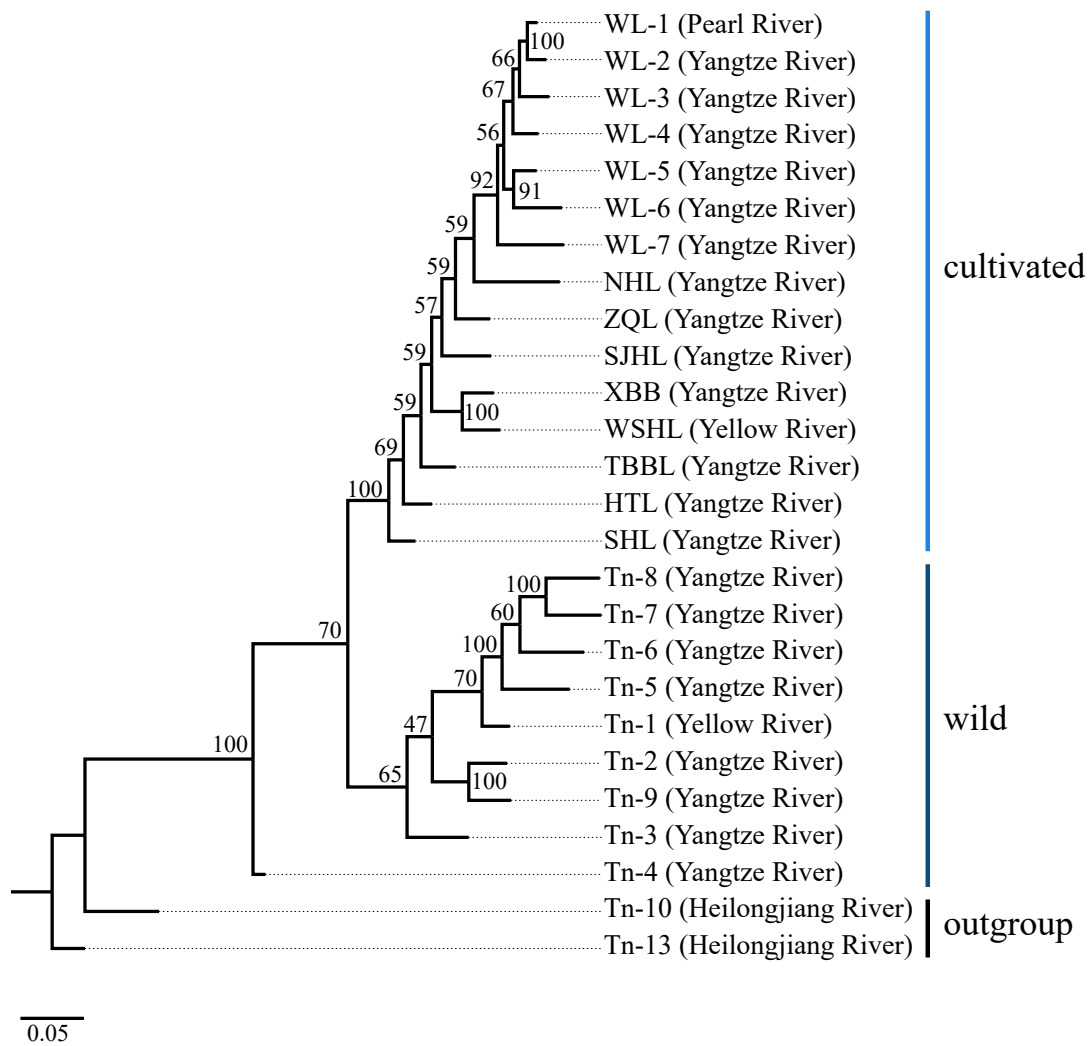

**Figure S3** Phylogenetic relationships of diploid *Trapa natans* (2x, AA) from the PYY region inferred from maximum likelihood (ML) analysis based on SNP data.

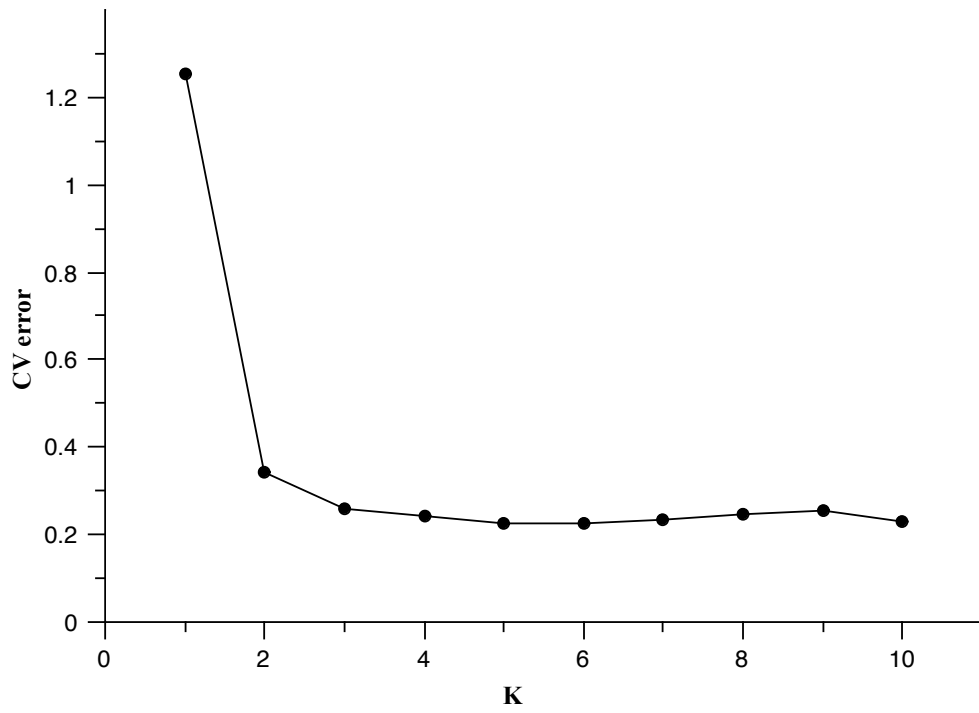

**Figure S4** Plot of ADMIXTURE cross-validation error across values of K.

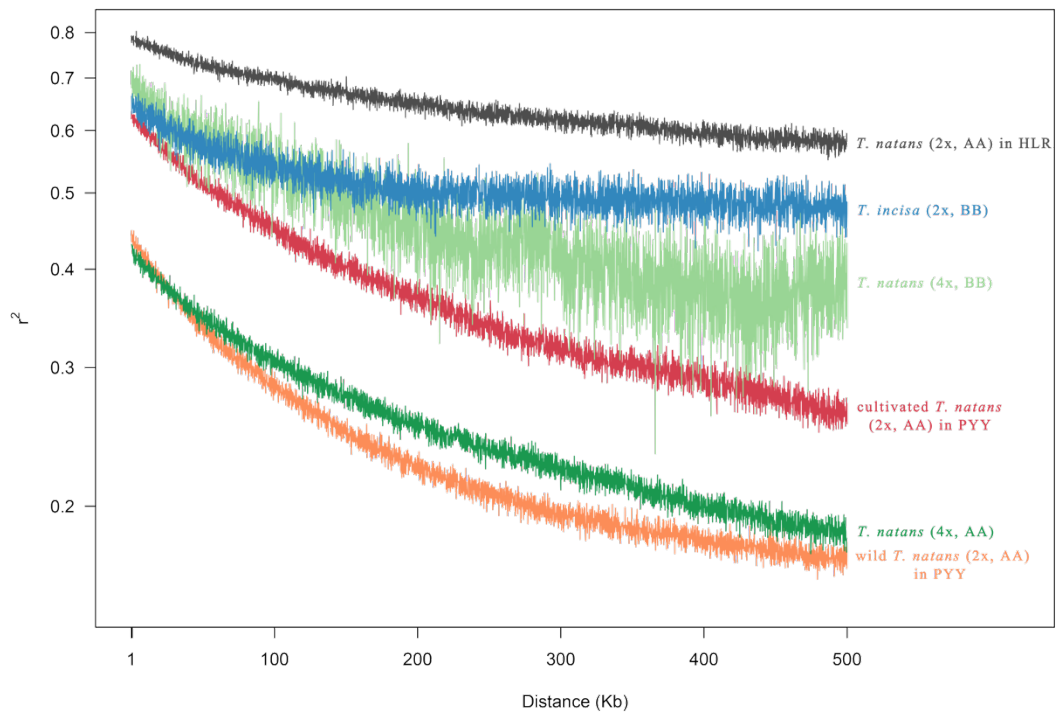

**Figure S5** LD decay determined by correlation of allele frequencies ( $r^2$ ) against distance (kb) in six *Trapa* populations. Note that the A and B subgenomes of tetraploid *T. natans* individuals were treated separately (4x, AA vs. BB). PYY, Pearl-Yangtze-Yellow River region; HLR, Heilongjiang River region.

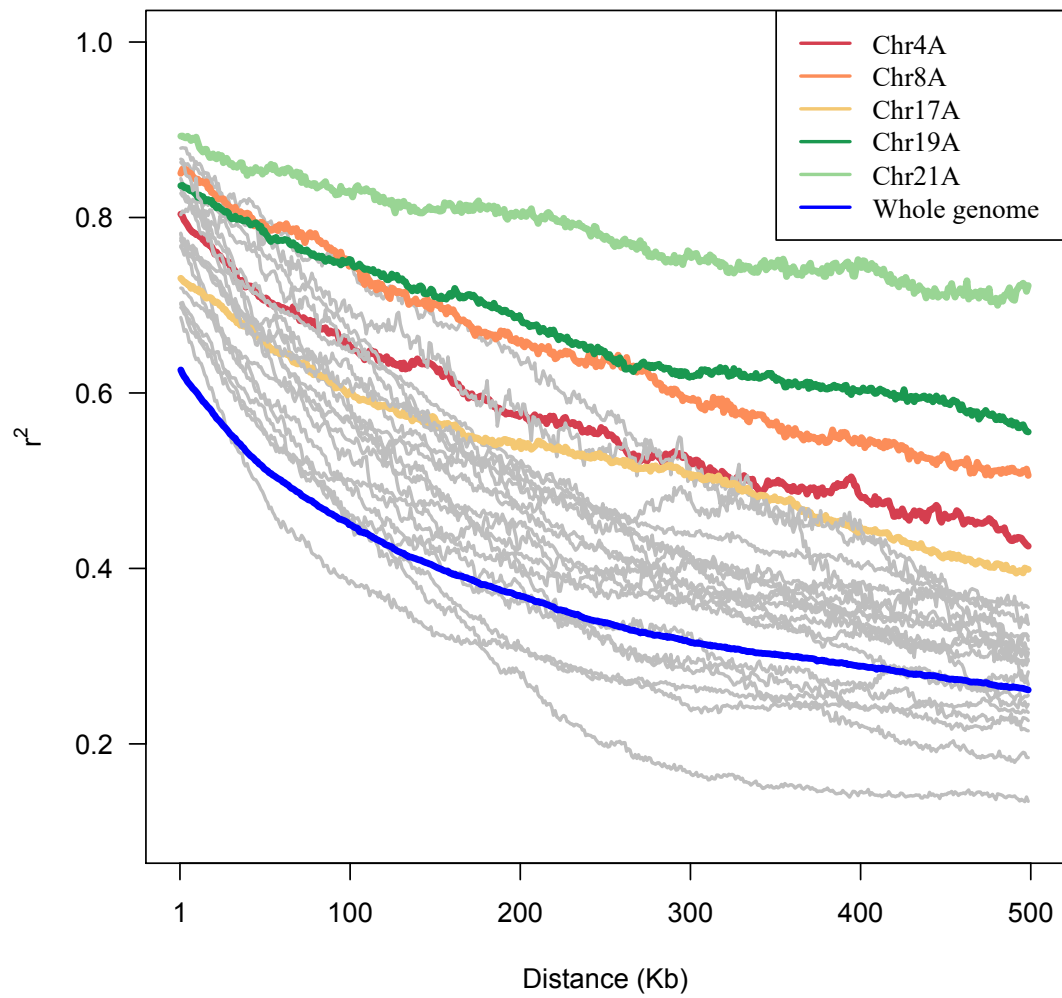

**Figure S6** LD decay distances in cultivars of *Trapa natans* for each of the 24 chromosomes.

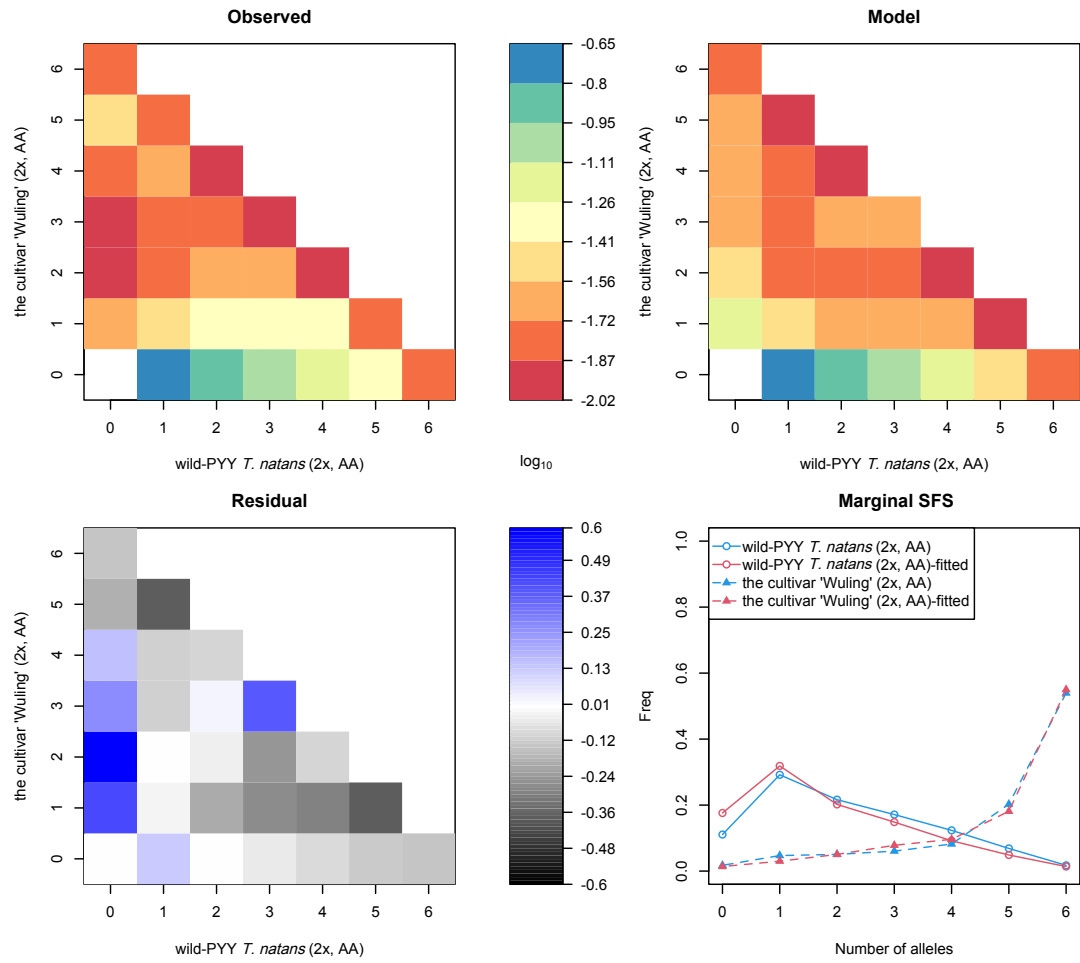

**Figure S7** The goodness-of-fit of the best scenario summarized by the observed 2D-SFS, modeled 2D-SFS, residuals between the model and the data, and marginal SFS.

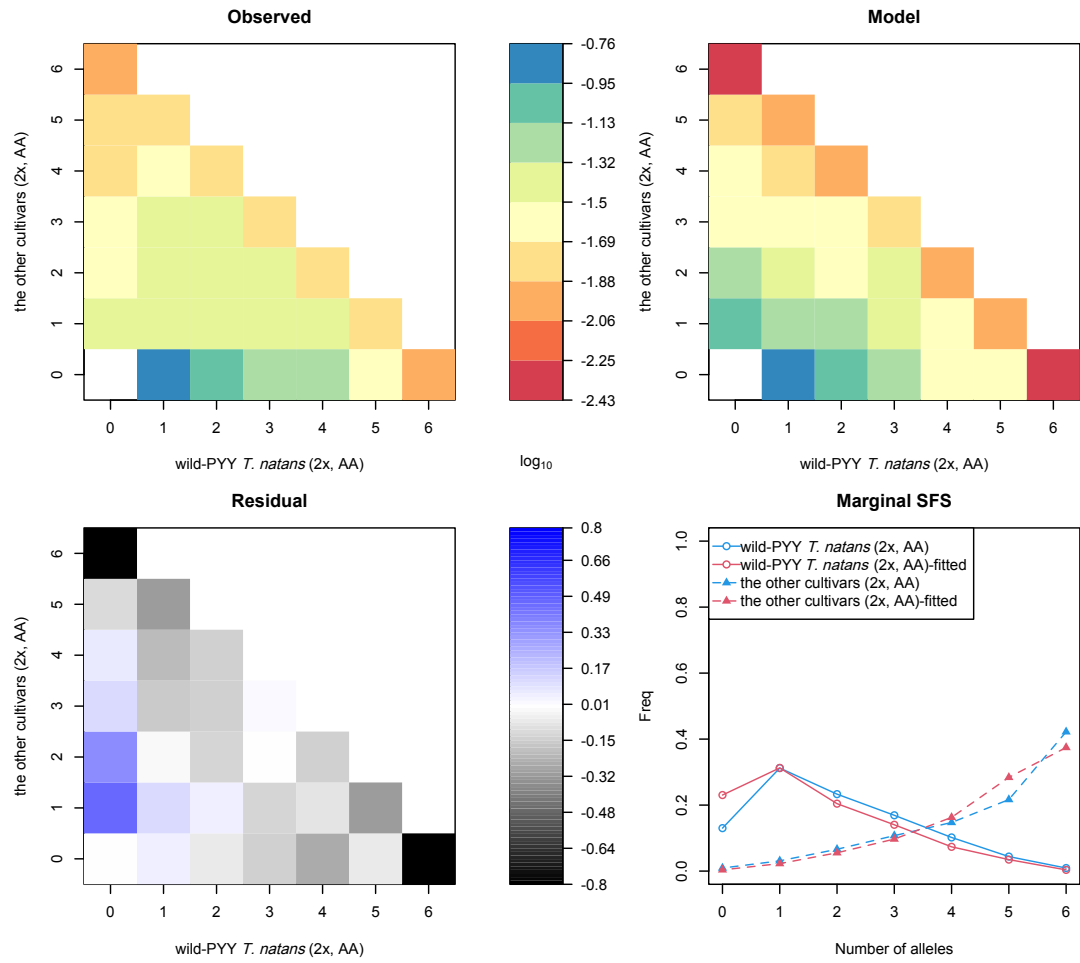

**Figure S7 (continued)**



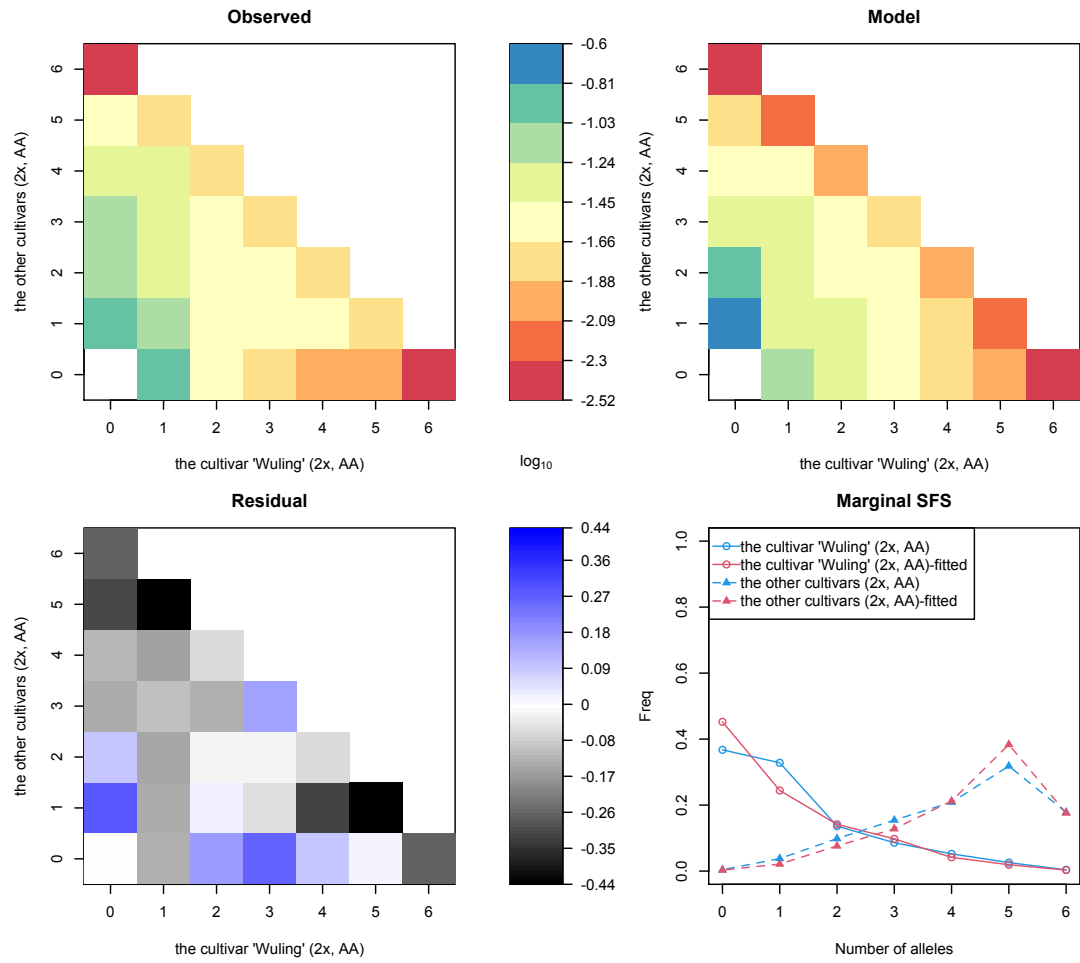

**Figure S7 (continued)**

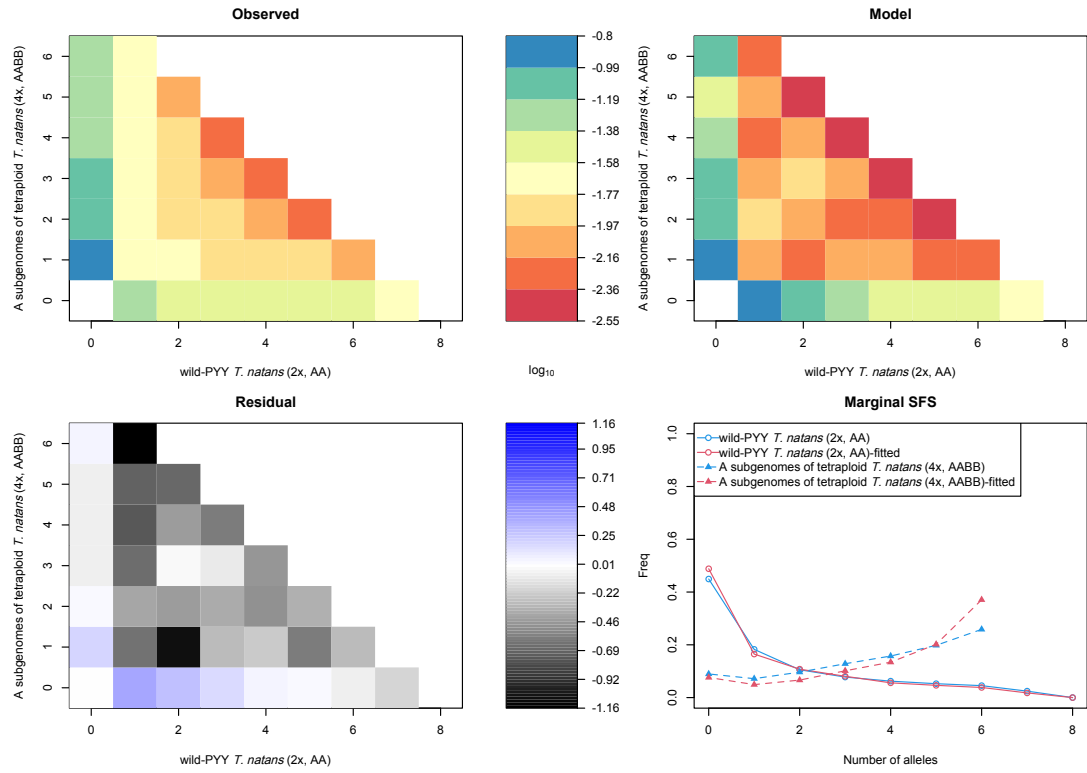

**Figure S7 (continued)**

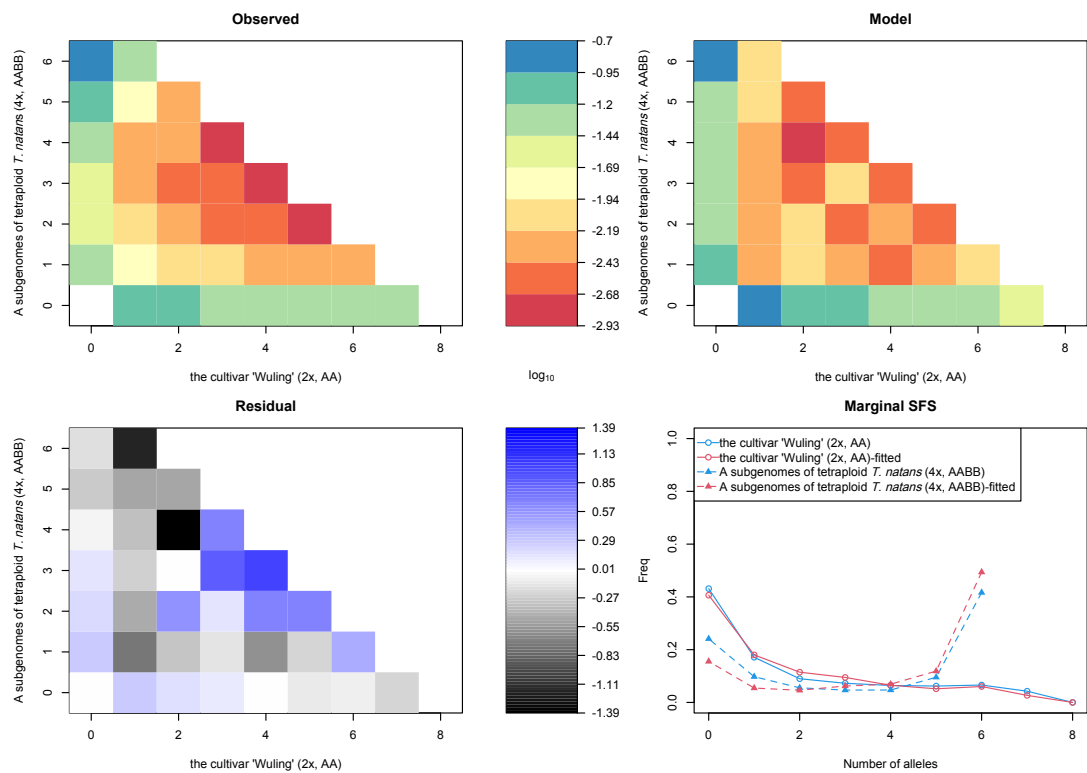

**Figure S7 (continued)**

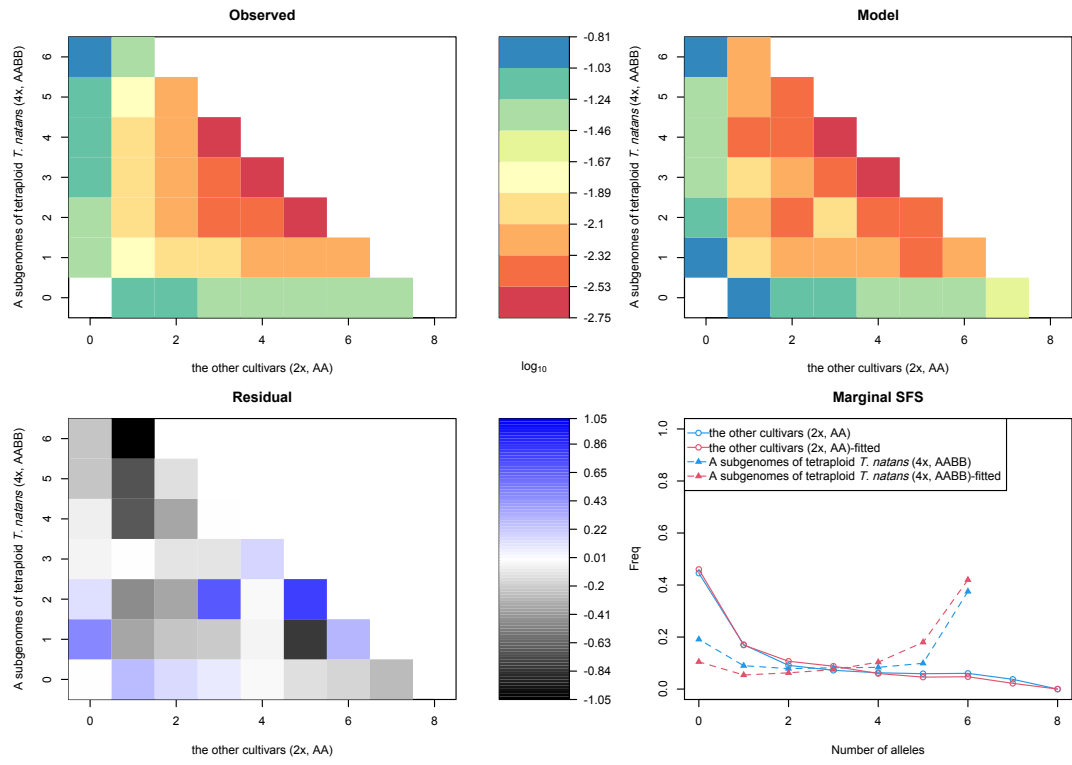

**Figure S7 (continued)**

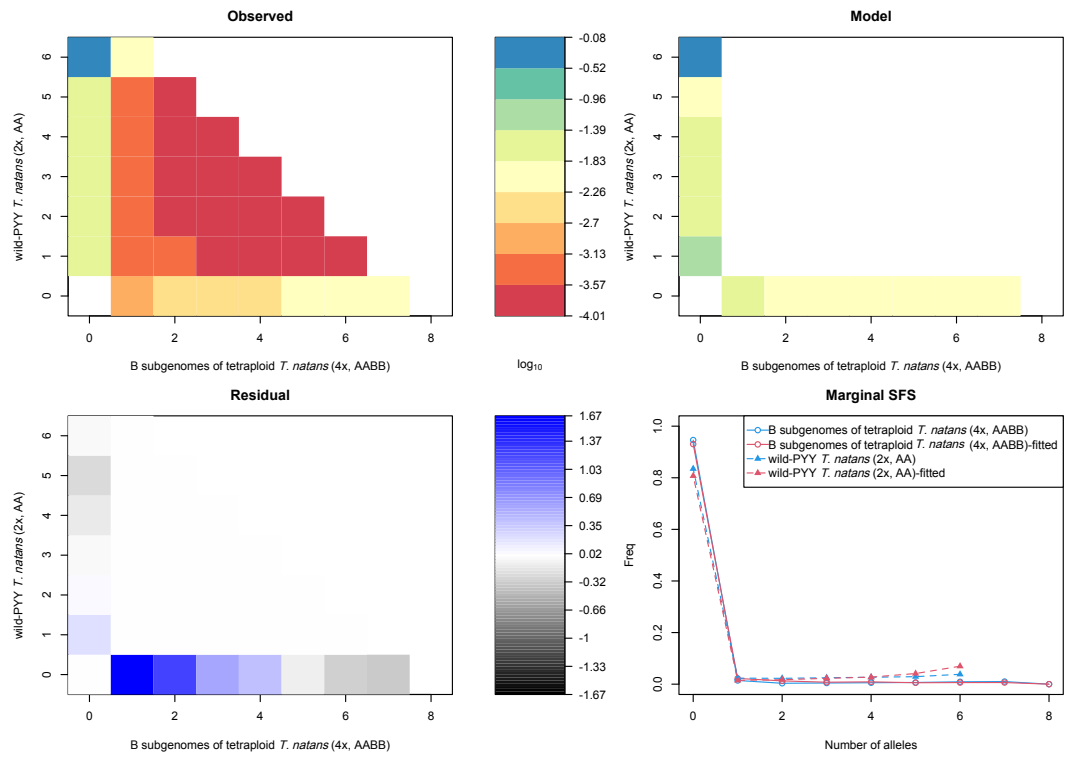

**Figure S7 (continued)**

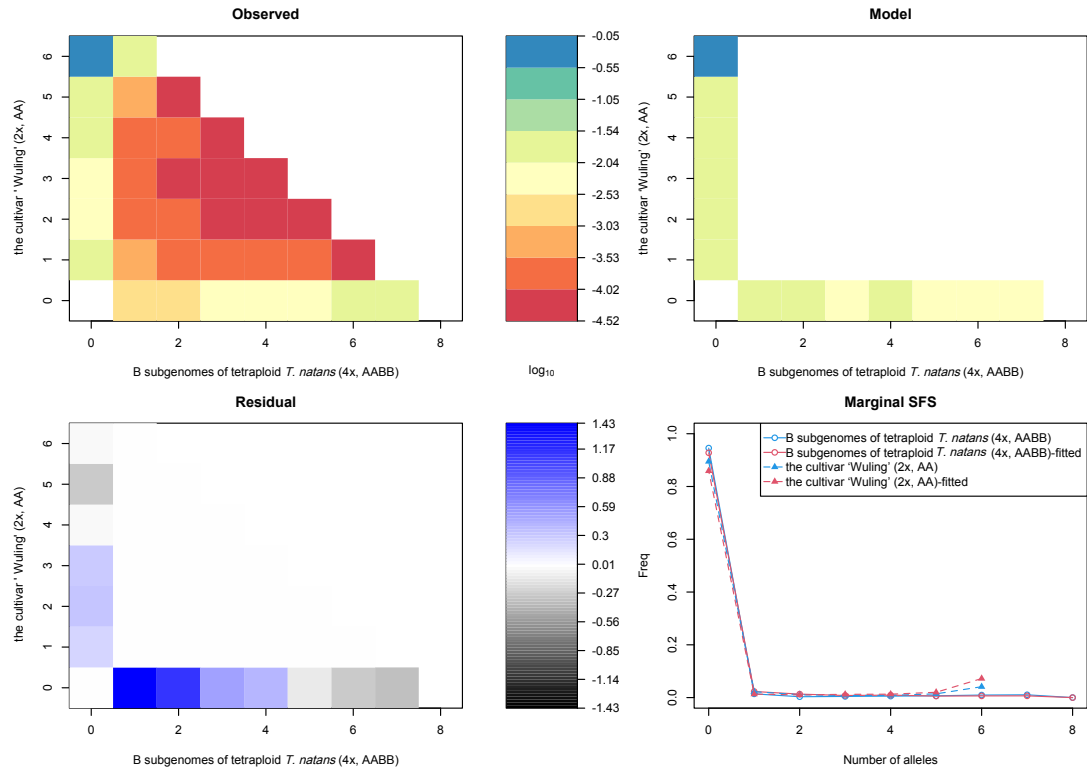

**Figure S7 (continued)**

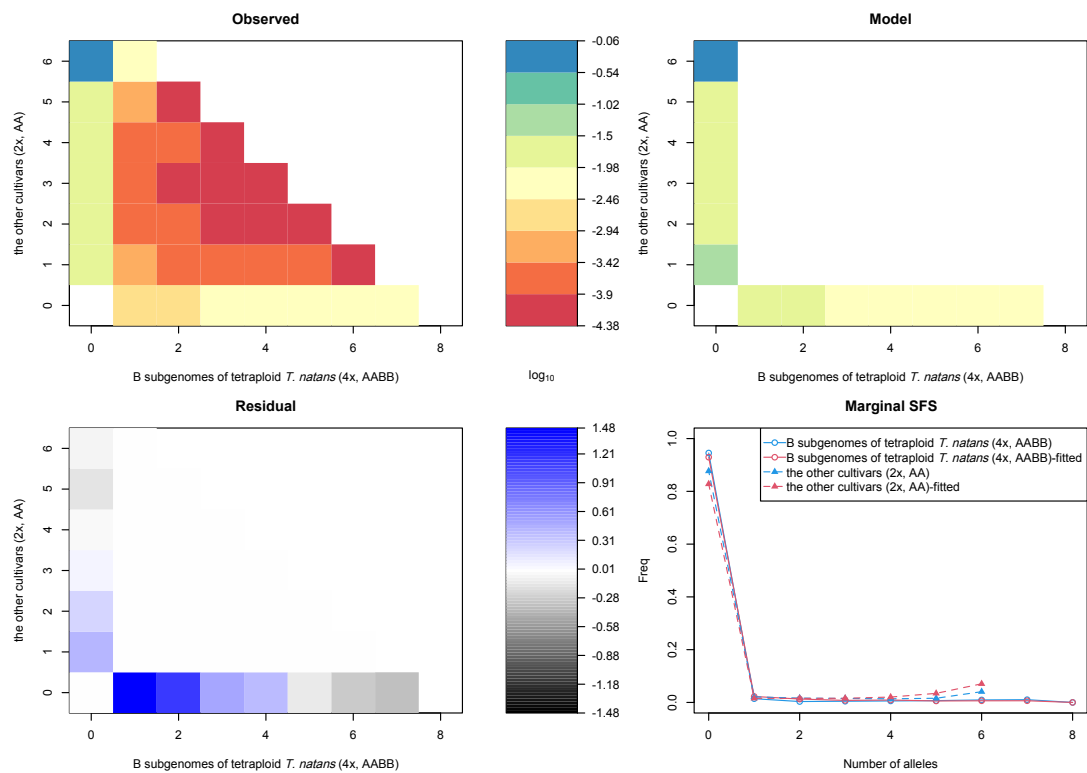

**Figure S7 (continued)**

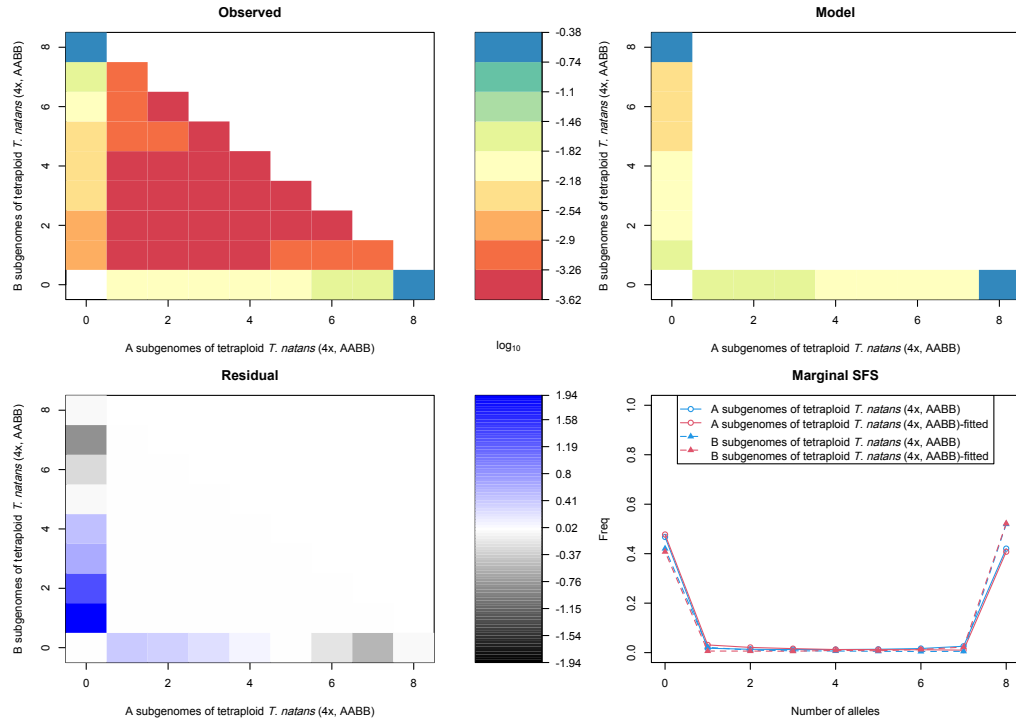

**Figure S7 (continued)**

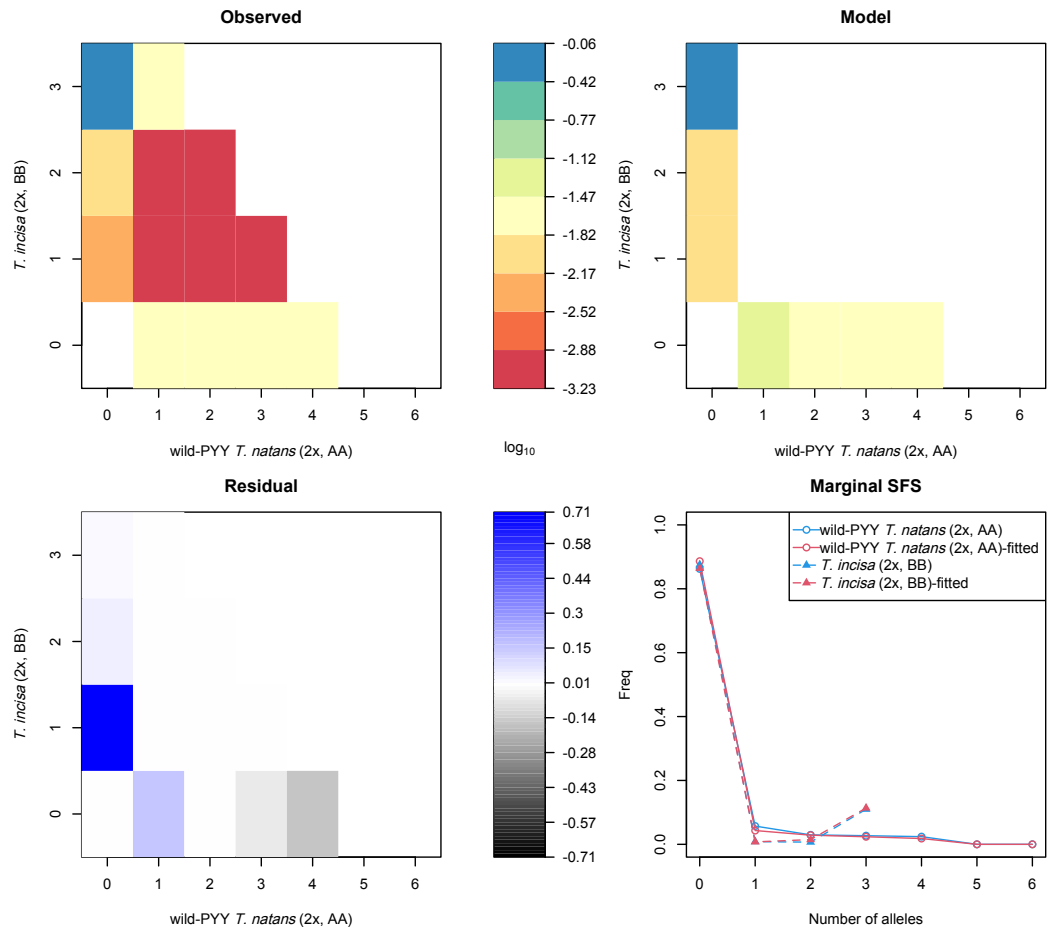

**Figure S7 (continued)**

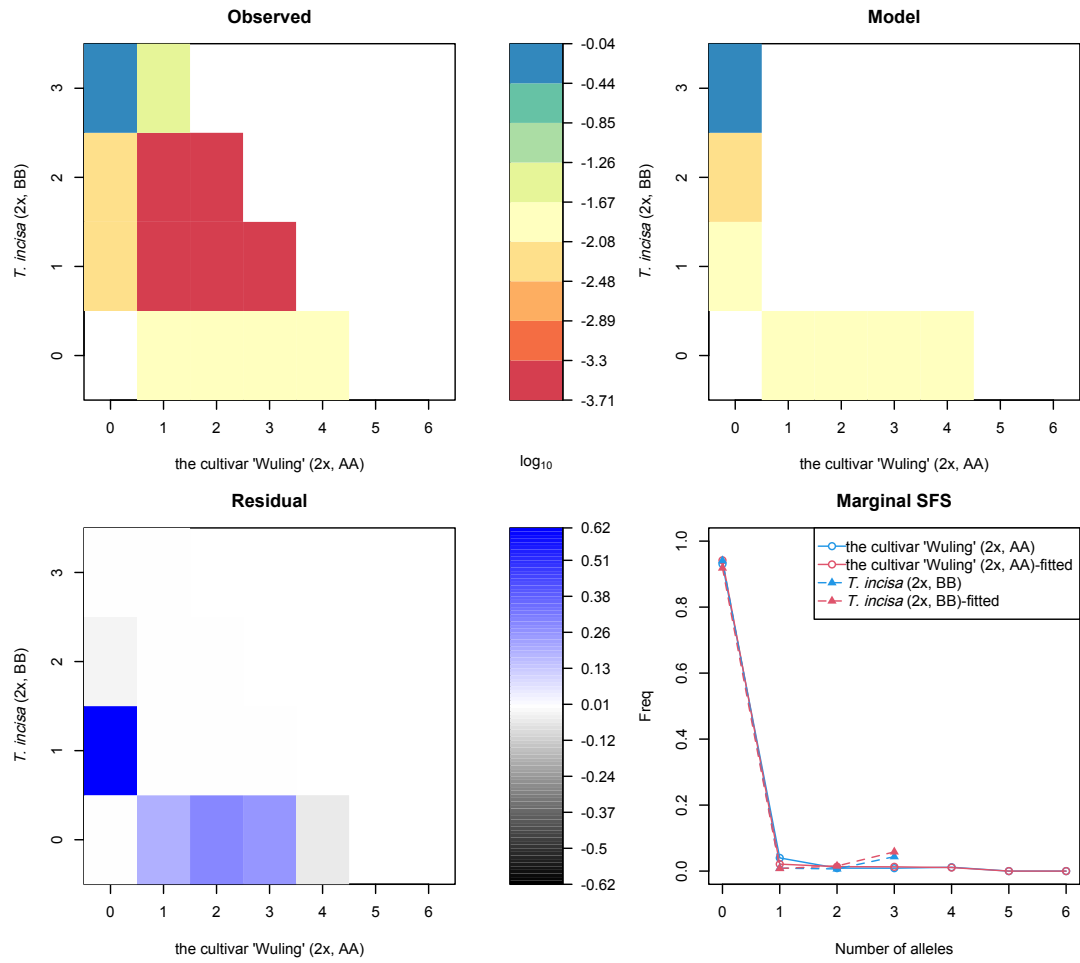

**Figure S7 (continued)**

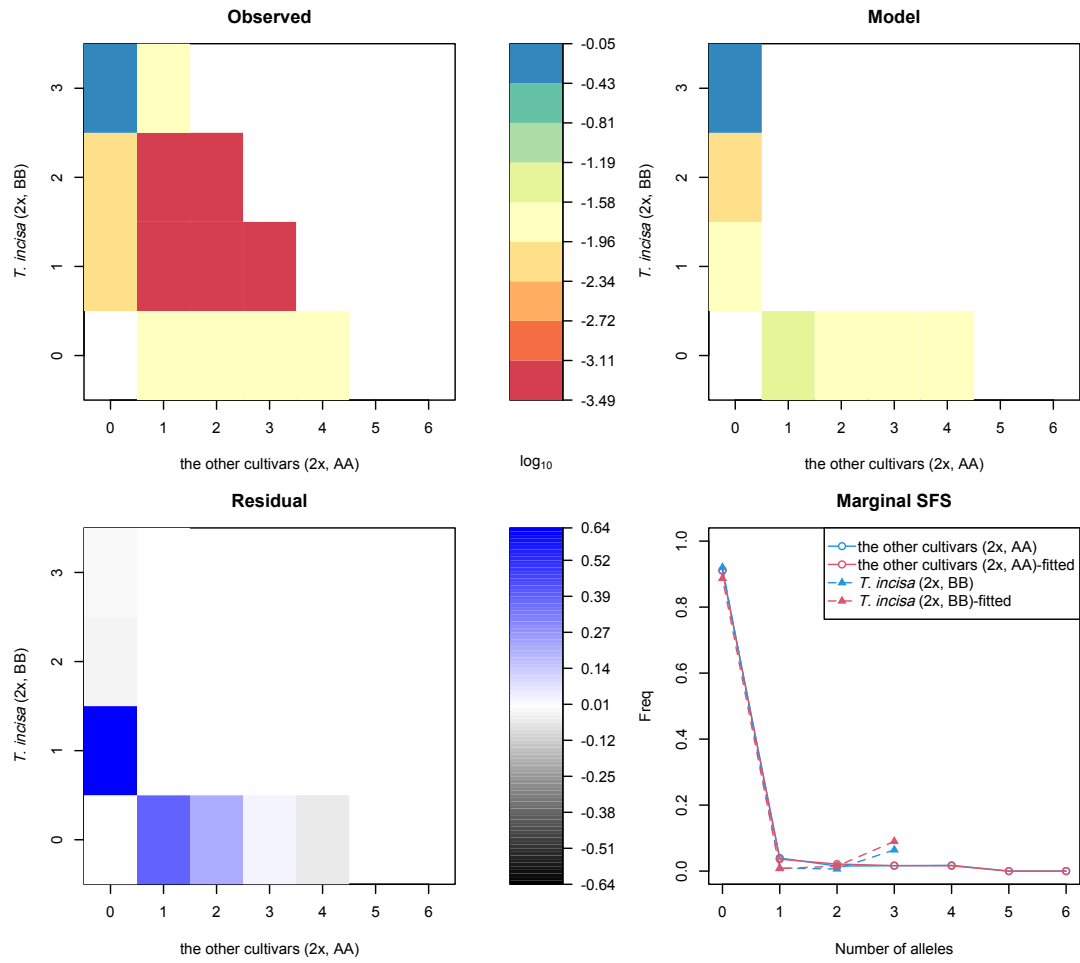

**Figure S7 (continued)**

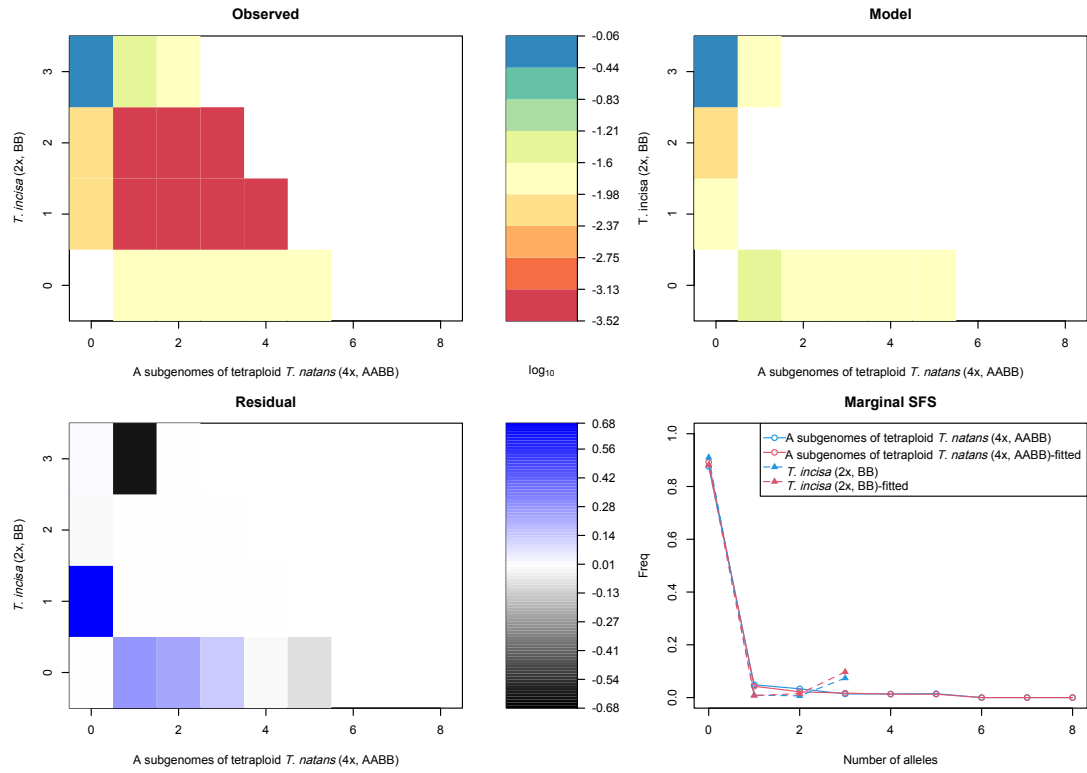

**Figure S7 (continued)**

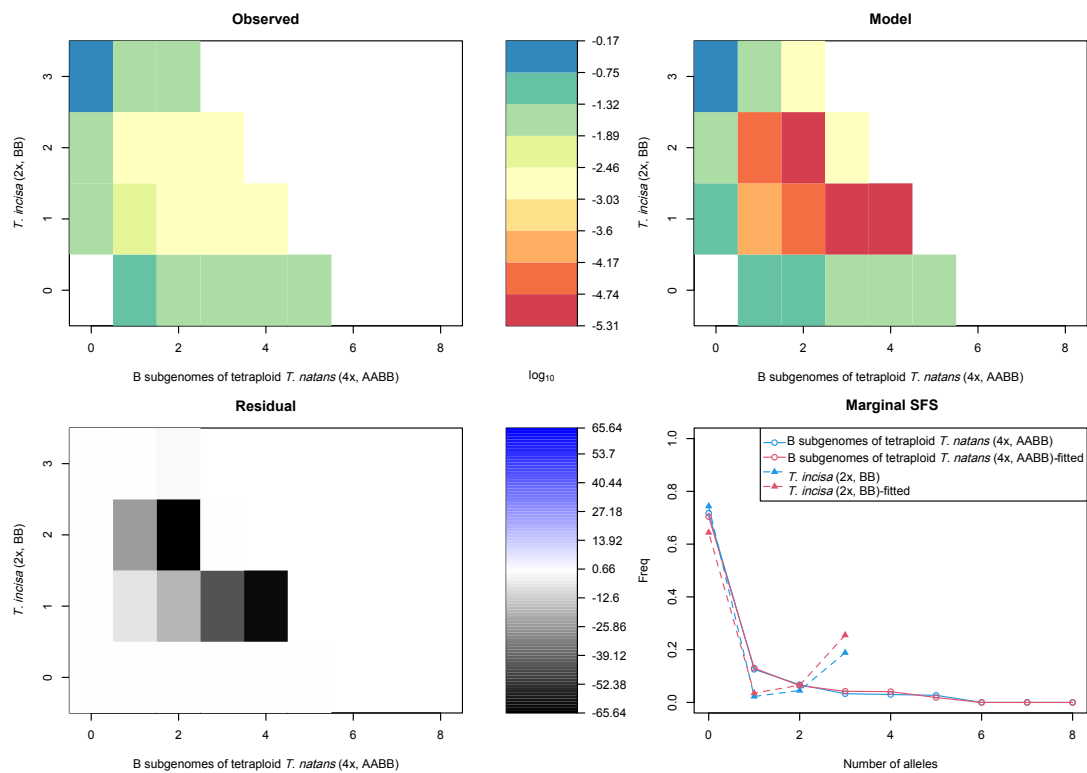

**Figure S7 (continued)**



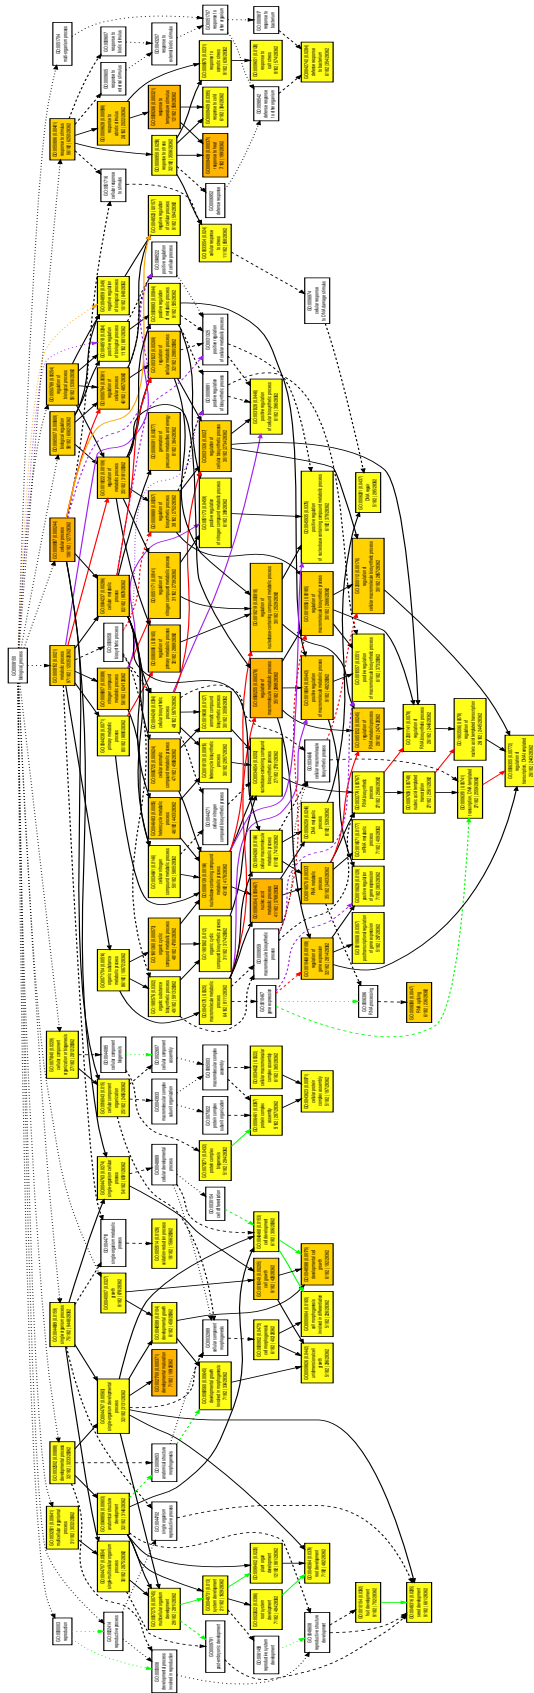

**Figure S8** Significantly enriched biological process GO categories of 205 candidate genes under positive selection.

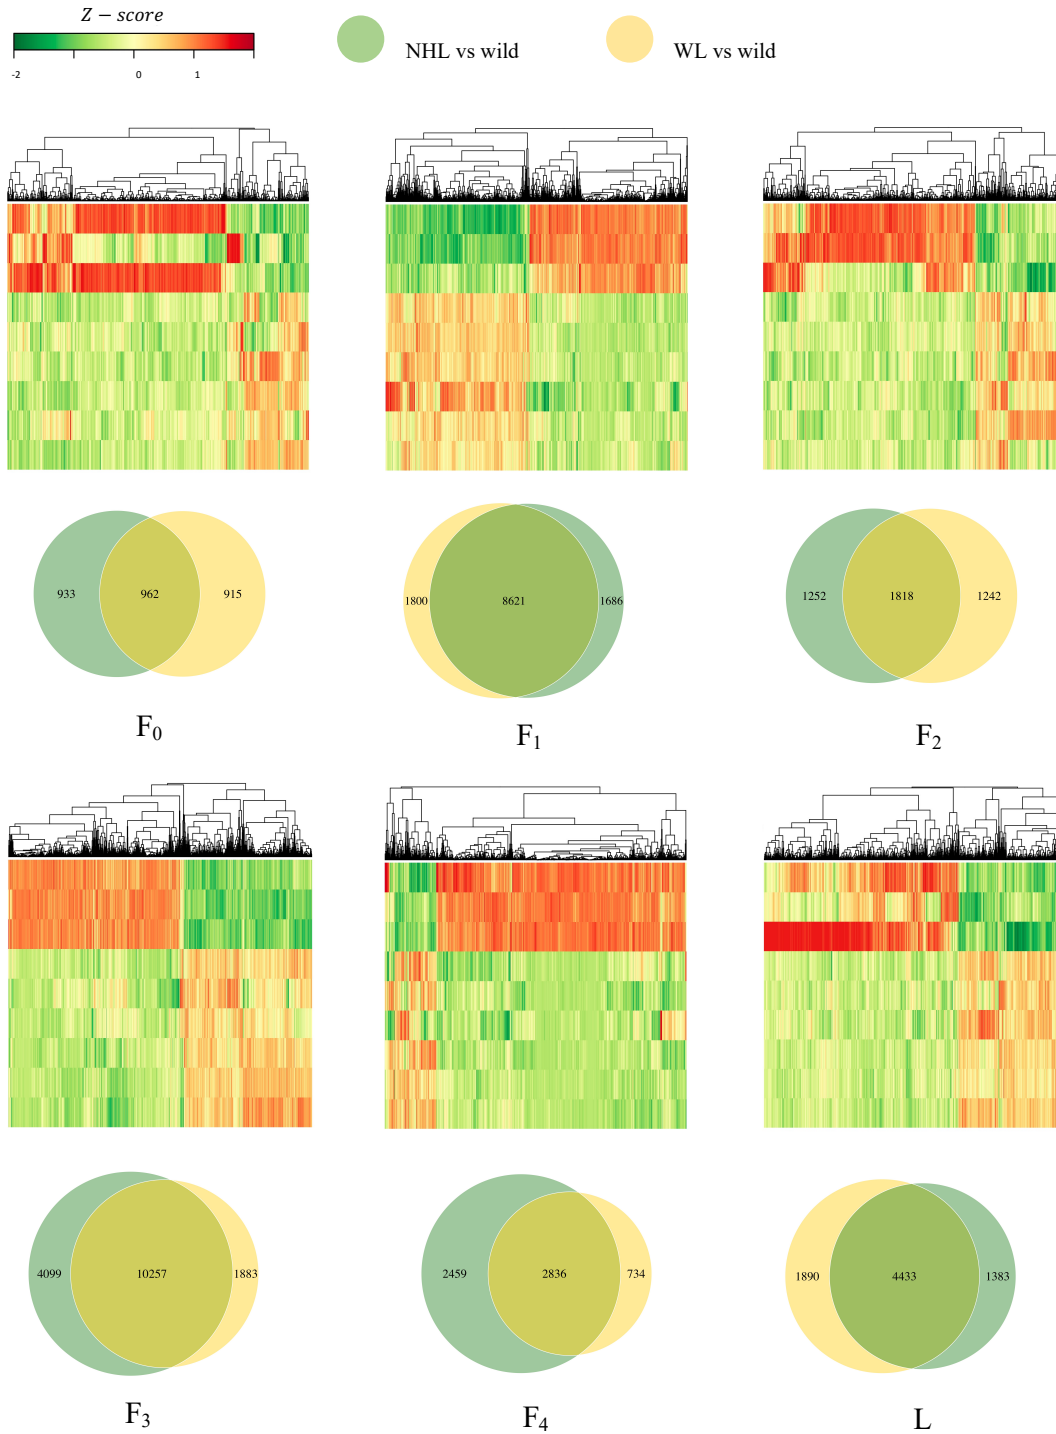

**Figure S9** Heatmaps and Venn diagrams of common differentially expressed (up- or downregulated) genes (DEGs) shared by the two cultivar–wild comparisons (i.e. ‘Wuling’ vs. wild and ‘Nanhuling’ vs. wild). F<sub>0</sub>: flower bud, F<sub>1</sub>: fertilized flower, F<sub>2</sub>: fruit before sepal abscission, F<sub>3</sub>: fruit after sepal abscission, F<sub>4</sub>: juvenile fruit, L: leaf.

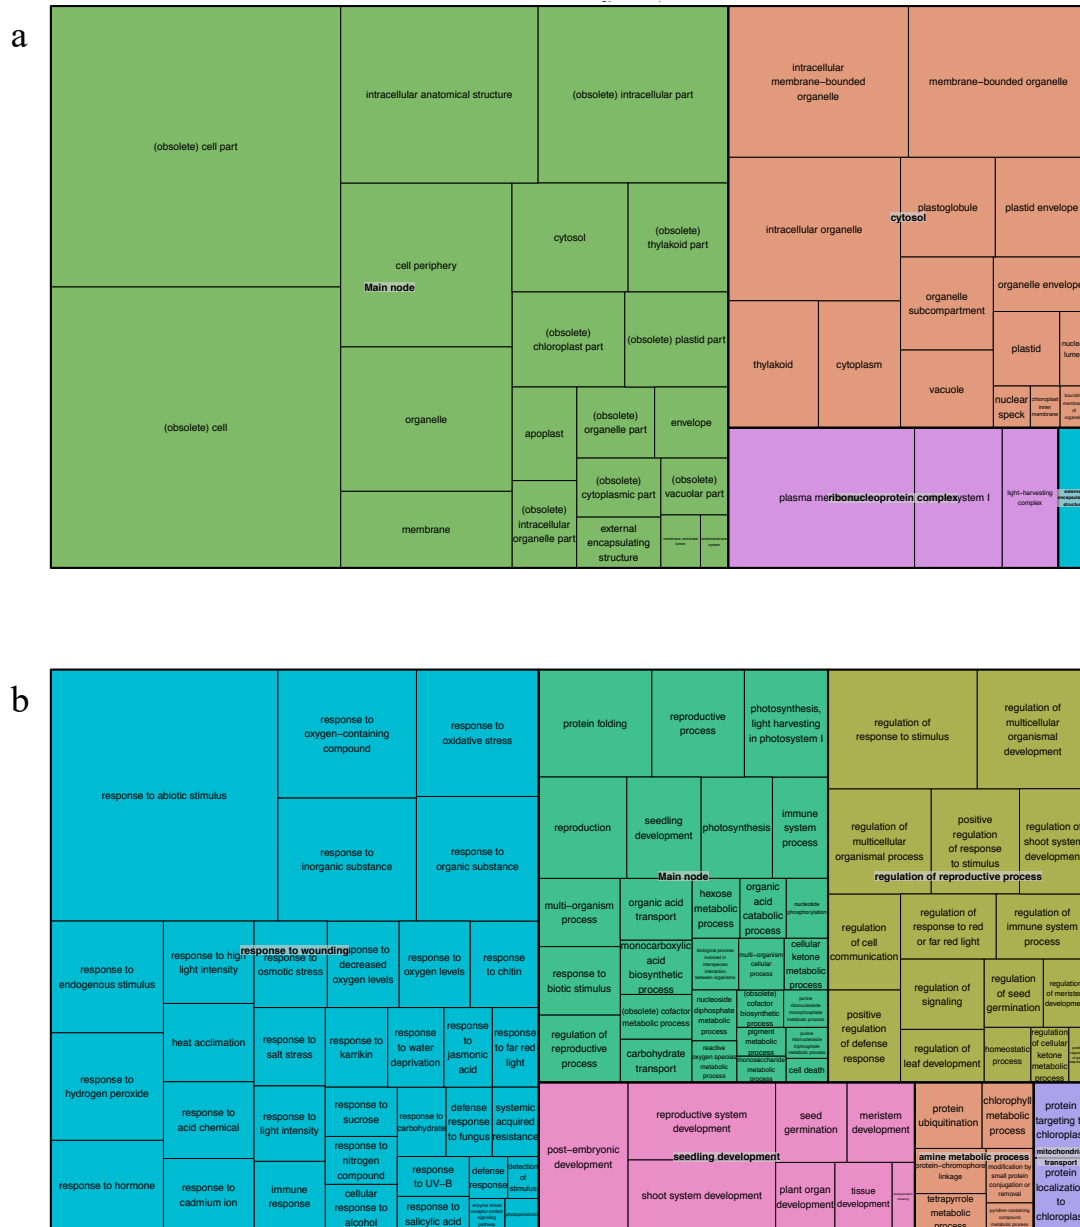

**Figure S10** Significantly enriched GO categories under biological process of differentially expressed (up- or downregulated) genes (DEGs) shared by the two cultivar–wild comparisons (i.e. ‘Wuling’ vs. wild and ‘Nanhuling’ vs. wild). a, c, e, g, i, upregulated genes at developmental stages, F<sub>0</sub> (flower bud), F<sub>1</sub> (fertilized flower), F<sub>2</sub> (fruit before sepal abscission), F<sub>3</sub> (fruit after sepal abscission) and F<sub>4</sub> (juvenile fruit), and in leaf tissues, respectively. b, d, g, h, k, downregulated genes at F<sub>0</sub>, F<sub>1</sub>, F<sub>2</sub>, F<sub>3</sub> and F<sub>4</sub> stages and in leaf tissues, respectively.

**c**

|                                     |                                                       |                                              |                                 |                                                                 |                                                    |                                             |                                          |                                   |                                        |                             |                                  |                                           |                                         |                        |                         |
|-------------------------------------|-------------------------------------------------------|----------------------------------------------|---------------------------------|-----------------------------------------------------------------|----------------------------------------------------|---------------------------------------------|------------------------------------------|-----------------------------------|----------------------------------------|-----------------------------|----------------------------------|-------------------------------------------|-----------------------------------------|------------------------|-------------------------|
| membrane invagination               | response to UV-B                                      | tropism                                      | heterochromatin assembly        | ribosomal small subunit assembly                                | cellular response to acid chemical                 | wax metabolic process                       | hormone transport                        | meristem development              | shoot system morphogenesis             | plant epidermis development |                                  |                                           |                                         |                        |                         |
| flavonoid biosynthetic process      | response to karrikin                                  | response to gravity                          | regulation of stomatal movement | cell wall modification involved in multidimensional cell growth | stomatal movement                                  | protein import into chloroplast stroma      | DNA endoreplication                      | karyogamy                         | meristem maintenance                   | root system development     | phloem or xylem histogenesis     | gametophyte development                   |                                         |                        |                         |
| cytokinesis by cell plate formation | regulation of flavonoid biosynthetic process          | response to jasmonic acid                    | amino acid import               | regulation of meristem structural organization                  | water transport                                    | pyrimidine nucleoside biosynthetic process  | histone H3-K9 methylation                | asymmetric cell division          | defense response by callose deposition | callose localization        | anatomical structure arrangement | post-embryonic animal organ morphogenesis | plant epidermal cell differentiation    | cellularization        |                         |
| flavonoid metabolic process         | positive regulation of flavonoid biosynthetic process | photoregulation                              | mitotic recombination           | histone H3-K9 modification                                      | response to sucrose                                | regulation of defense response to bacterium | pyrimidine biosynthetic process          | regulation of DNA endoreplication | dsRNA processing                       | response to dsRNA           | plant epidermis morphogenesis    | embryo sac development                    | post-embryonic animal organ development | seed coat development  |                         |
| response to nematode                | heterochromatin organization                          | modulation by symbiont of RNA levels in host | cellular response to virus      | protein nitrosylation                                           | regulation of cell wall organization or biogenesis | regulation of response to alcohol           | response to heat                         | response to salicylic acid        | regulation of gene silencing           | response to salicylic acid  | maintenance of cell number       | xylem development                         | syncytium formation                     | animal organ formation | phloem transport        |
| response to cyclopentenone          | muilage metabolic process                             | regulation of meristem development           | fluid transport                 | cellular response to iron ion                                   | defense response to insect                         | RNA secondary structure unwinding           | regulation of response to osmotic stress | acclimation                       | gibberellin metabolic process          | terpenoid metabolic process | stem cell population maintenance | stomatal complex patterning               | cuticle development                     | vascular transport     | cell fate specification |

**d**

|                               |                                                |                                        |                                         |                                                      |                                         |                                                       |                                  |                                            |                                                     |                                          |                                                                    |                                                 |                       |
|-------------------------------|------------------------------------------------|----------------------------------------|-----------------------------------------|------------------------------------------------------|-----------------------------------------|-------------------------------------------------------|----------------------------------|--------------------------------------------|-----------------------------------------------------|------------------------------------------|--------------------------------------------------------------------|-------------------------------------------------|-----------------------|
| response to water deprivation | seed germination                               | response to jasmonic acid              | meristem development                    | regulation of tetrapyrrole metabolic process         | regulation of flower development        | isoprenoid catabolic process                          | terpenoid catabolic process      | response to gravity                        | sucrose biosynthetic process                        | response to monosaccharide               | flavonoid biosynthetic process                                     | seedling development                            |                       |
| phyllome development          | response to karrikin                           | galactolipid biosynthetic process      | post-embryonic animal organ development | heat acclimation                                     | regulation of undimensional cell growth | alternative mRNA splicing, via spliceosomes           | protein targeting to chloroplast | abscisic acid biosynthetic process         | defense response by callose deposition in cell wall | histone H3-K9 modification               | negative regulation of phosphoinositide signal transduction system | protein localization to chloroplast             |                       |
| response to cadmium ion       | regulation of response to red or far red light | starch metabolic process               | response to salicylic acid              | regulation of chlorophyll metabolic process          | chloroplast RNA processing              | regulation of phosphorelay signal transduction system | cell wall assembly               | salicylic acid mediated signaling pathway  | Golgi to vacuole transport                          | histone H3-K9 methylation                | jasmonic acid and ethylene-dependent systemic response             | very long-chain fatty acid biosynthetic process |                       |
| response to chitin            | galactolipid metabolic process                 | flavonoid metabolic process            | regulation of response to alcohol       | stomatal closure                                     | stomatal process                        | regulation of response to water deprivation           | muilage metabolic process        | regulation of actin filament-based process | dehiscence                                          | regulation of shoot system morphogenesis | pollen germination                                                 | regulation of meristem development              |                       |
| stomatal movement             | regulation of stomatal movement                | regulation of shoot system development | cuticle development                     | positive regulation of response to water deprivation | regulation of leaf development          | induced systemic resistance                           | response to osmotic stress       | regulation of response to osmotic stress   | regulation of secondary metabolic process           | regulation of root development           | cellular response to dsRNA                                         | seed maturation                                 | seed dormancy process |

Figure S10 (continued)



g

|                         |                             |                                    |                                    |                                                         |                                                                 |                                     |                           |                                        |                                                      |                          |                                           |                                 |                                             |
|-------------------------|-----------------------------|------------------------------------|------------------------------------|---------------------------------------------------------|-----------------------------------------------------------------|-------------------------------------|---------------------------|----------------------------------------|------------------------------------------------------|--------------------------|-------------------------------------------|---------------------------------|---------------------------------------------|
| response to salt stress | root development            | trichome differentiation           | abscisic acid catabolic process    | positive regulation of histone modification             | positive regulation of post-embryonic development               | postreplication repair              | cuticle development       | DNA endoreplication                    | positive regulation of defense response to bacterium | cell fate specification  | jasmonic acid metabolic process           |                                 |                                             |
|                         | meristem development        | plant-type cell wall biogenesis    | seedling development               | flavonoid metabolic process                             | positive regulation of multi-organism process                   | cytokinesis by cell plate formation | response to nematode      | fluid transport                        | shoot system morphogenesis                           | water transport          | isocitrate metabolic process              | terpene metabolic process       |                                             |
| meristem maintenance    |                             | cellular response to acid chemical | regulation of meristem development | regulation of abscisic acid-activated signaling pathway | Main node                                                       | stomatal complex patterning         | cell wall assembly        | asymmetric cell division               | mRNA transcription                                   | syncytium formation      | response to transition metal nanoparticle | regulation of stomatal movement | regulation of anthocyanin metabolic process |
|                         | plant epidermis development | response to UV-B                   | maintenance of cell number         | regulation of response to alcohol                       | cell wall modification involved in multidimensional cell growth | flavonoid biosynthetic process      | photosynthesis            | asymmetric cell division               | mitotic recombination                                | response to disaccharide | regulation of multi-organism process      | oxylipin metabolic process      | response to ozone                           |
| gametophyte development |                             | anatomical structure arrangement   | RNA secondary structure unwinding  | post-embryonic animal organ development                 | defense response to Gram-negative bacterium                     | membrane invagination               | histone H3-K9 methylation | regulation of shoot system development | brassinosteroid homeostasis                          | starch metabolic process | dehiscence                                | pollen germination              | regulation of gene silencing                |

h

|                                                |                                                         |                                           |                                                   |                                             |                                                                |                                                              |                                                |                                              |                                       |                                |                                                           |                               |                                        |                               |
|------------------------------------------------|---------------------------------------------------------|-------------------------------------------|---------------------------------------------------|---------------------------------------------|----------------------------------------------------------------|--------------------------------------------------------------|------------------------------------------------|----------------------------------------------|---------------------------------------|--------------------------------|-----------------------------------------------------------|-------------------------------|----------------------------------------|-------------------------------|
| response to salicylic acid                     | vegetative to reproductive phase transition of meristem | salicylic acid mediated signaling pathway | seed germination                                  | entrainment of circadian clock              | negative regulation of phosphorelay signal transduction system | desubstrin-independent cleavage of nuclear-histonebound mRNA | nuclear-histonebound mRNA catabolic process    | cellular response to dsRNA                   | regulation of anion channel activity  | regulation of leaf development | meristem development                                      |                               |                                        |                               |
|                                                | response to chitin                                      | energy quenching                          | heat acclimation                                  | response to transition metal nanoparticle   | regulation of meristem development                             | longitudinal axis specification                              | regulation of auxin mediated signaling pathway | regulation of photosynthesis                 | fat-soluble vitamin metabolic process | pollen germination             | regulation of leaf morphogenesis                          | cuticle development           |                                        |                               |
| regulation of response to red or far red light |                                                         | response to karrikin                      | nonphotochemical quenching                        | regulation of chlorophyll metabolic process | stomatal closure                                               | protein targeting to chloroplast                             | regulation of leaf senescence                  | regulation of anthocyanin metabolic process  | histone H3-K9 modification            | phloem or xylem histogenesis   | response to ozone                                         | cellular zinc ion homeostasis | defense response by callose deposition | animal organ senescence       |
|                                                | regulation of shoot system development                  | stomatal movement                         | response to sucrose                               | flavonoid metabolic process                 | transduction Main node                                         | chloroplast RNA processing                                   | response to freezing                           | regulation of flavonoid biosynthetic process | mitotic recombination                 | xanthophyll metabolic process  | regulation of gibberellin acid mediated signaling pathway | auxin transport               | induced systemic resistance            | meristem maintenance          |
| response to jasmonic acid                      |                                                         | seedling development                      | anthocyanin-containing compound metabolic process | systemic acquired resistance                | wax biosynthetic process                                       | response to singlet oxygen                                   | positive chemotaxis                            | photosynthesis                               | pectin biosynthetic process           | pigment catabolic process      | response to nitric oxide                                  | phloem or xylem histogenesis  | response to ozone                      | cellular zinc ion homeostasis |

Figure S10 (continued)

i

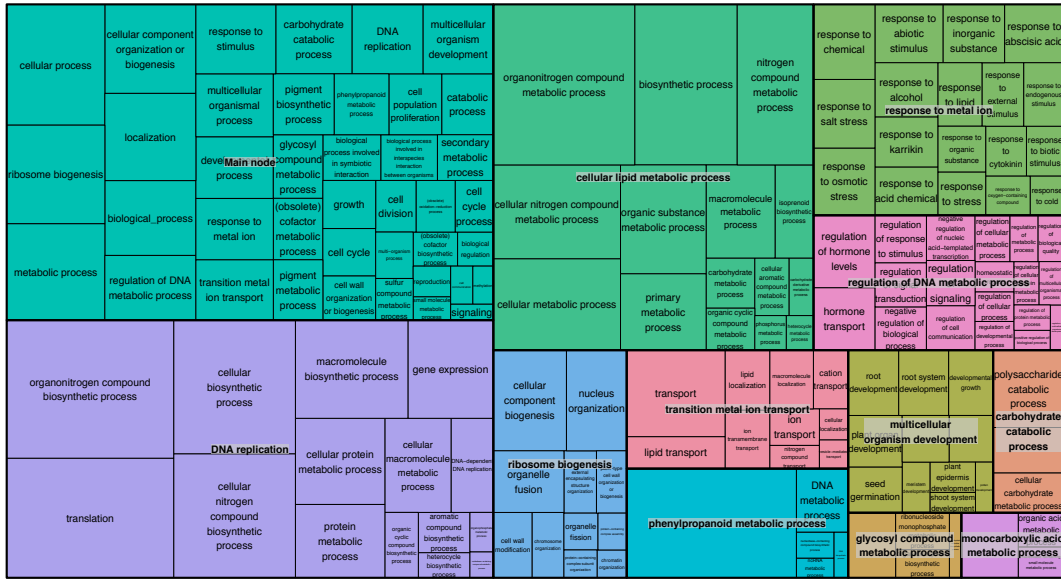

j

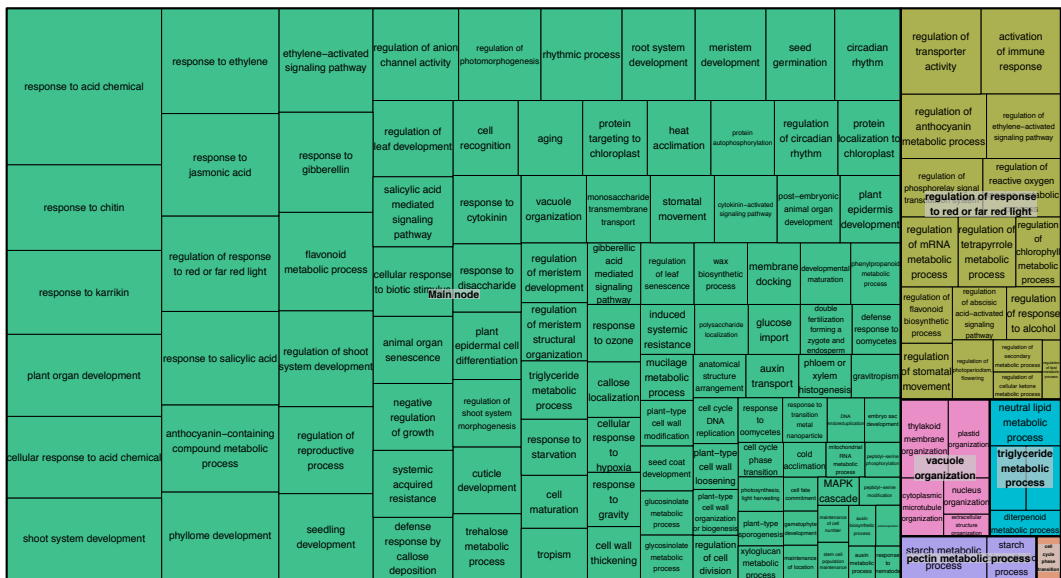

Figure S10 (continued)

k

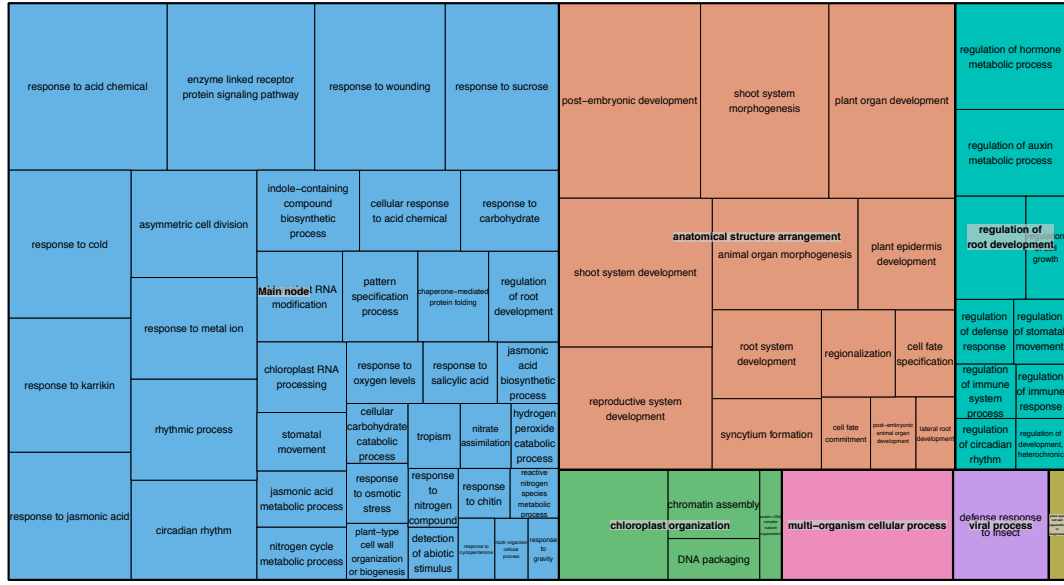

l

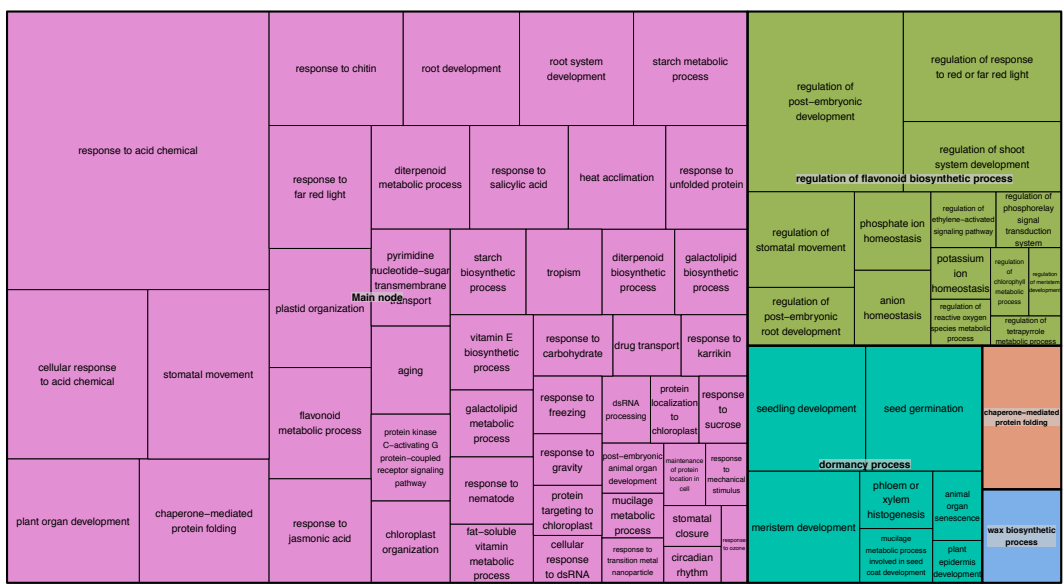

Figure S10 (continued)



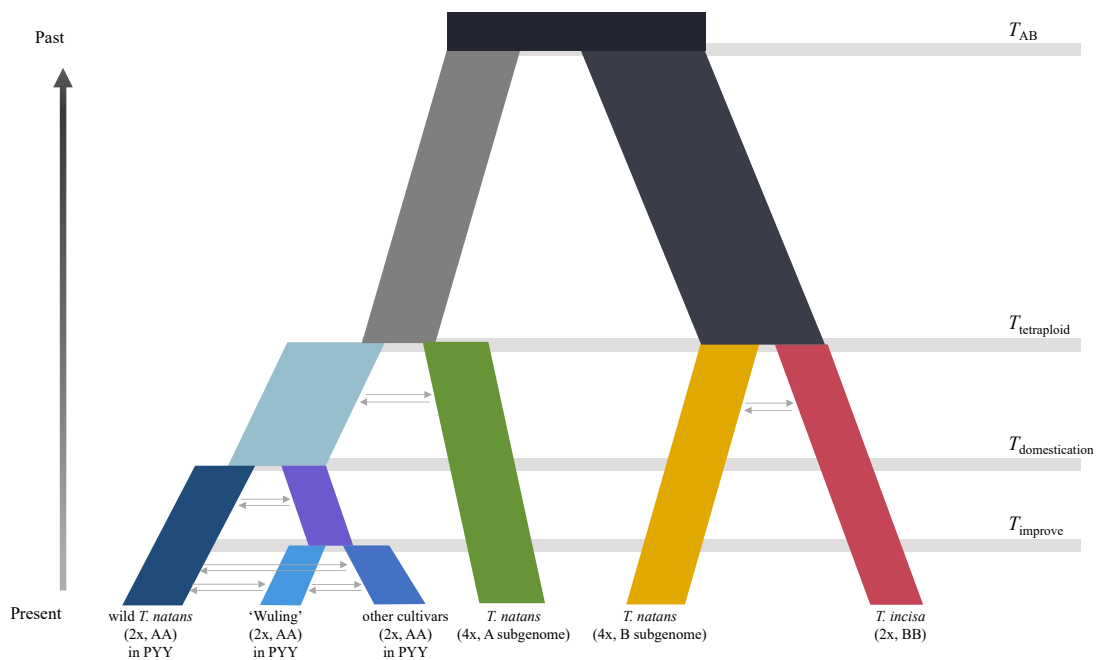

Model I

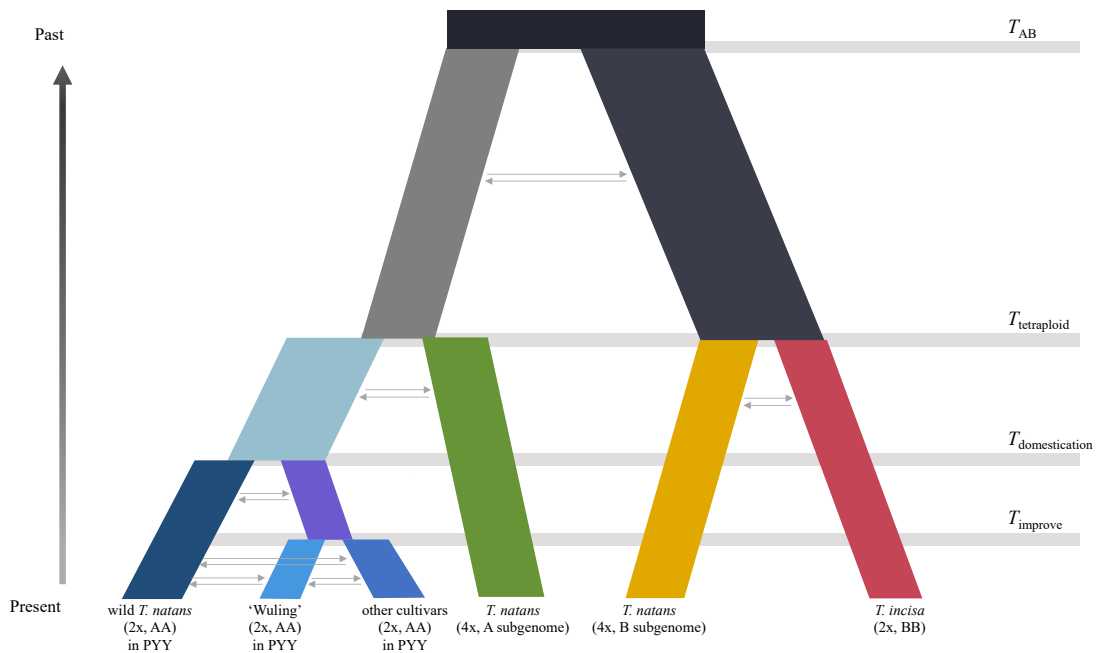

Model II

**Figure S11** Test of alternative demographic models, with different sets of migration directions using FASTSIMCOAL2. Parameter abbreviations:  $T_{\text{improve}}$ , time of improvement event for *T. natans* cultivar 'Wuling';  $T_{\text{domestication}}$ , time of domestication event for all cultivars of *T. natans*;  $T_{\text{tetraploid}}$ , time of origin of allotetraploid *T. natans* (4x, AABB);  $T_{\text{AB}}$ , divergence time of diploid *T. natans* and *T. incisa*.

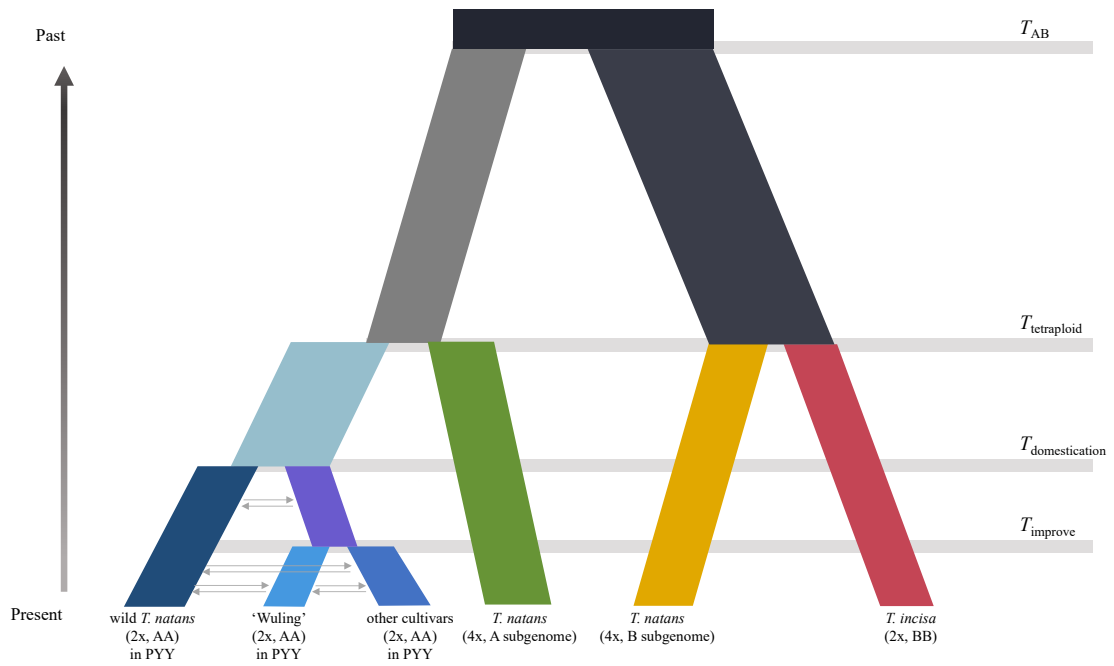

Model III

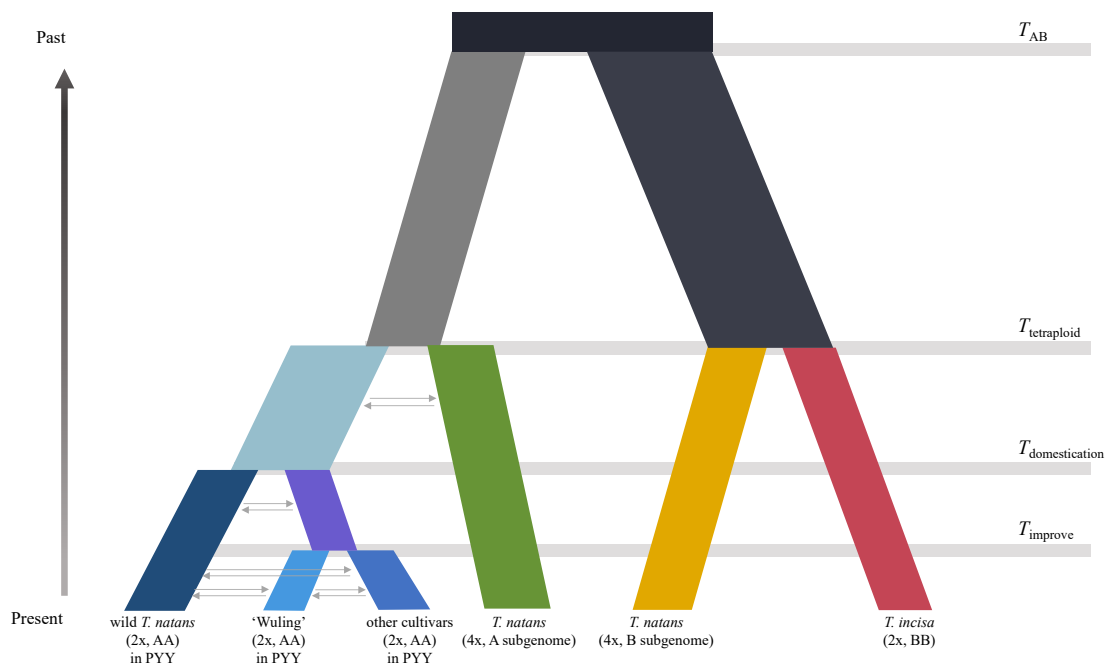

Model IV

Figure S11 (continued).

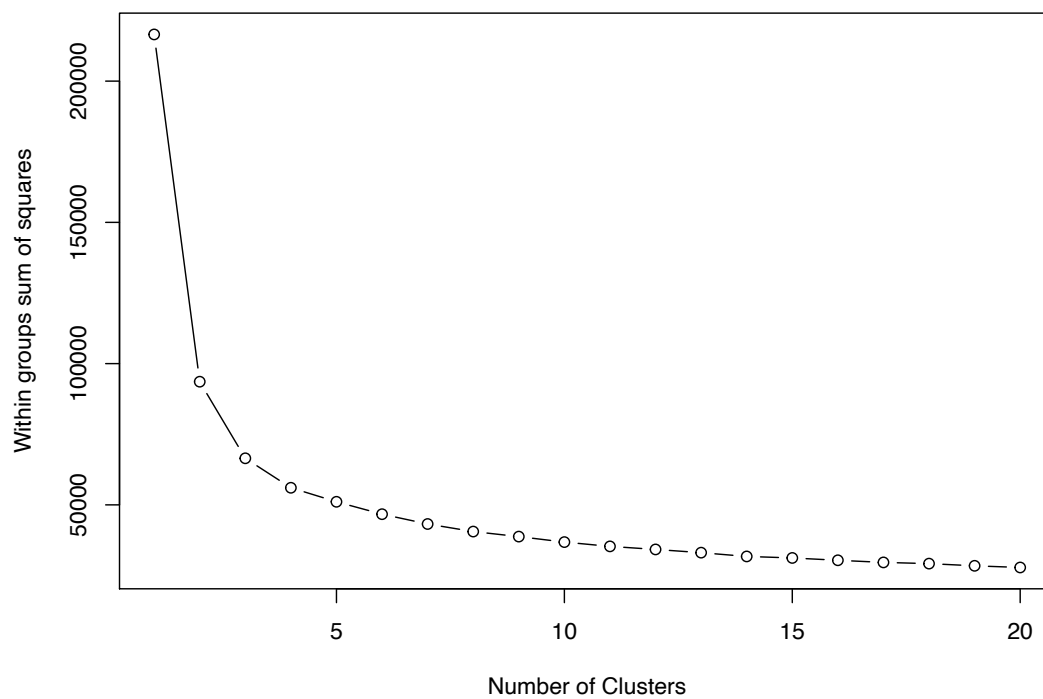

**Figure S12** The relationship between the sum of squared error (SSE) and the number of clusters. The number of clusters was set from 1 to 20.
